# Supplementary material for: A combined strategy for the synthesis of double functionalized α-zirconium phosphate organic derivatives
Source: Royal Society of Chemistry journal article supplement (doi:10.1039/c6nj01506a), 2016-01-01
Supplement: c6nj01506a1.pdf [file c6nj01506a1.pdf]

### Electronic Supplementary Information

#### A combined strategy for the synthesis of double functionalized $\alpha$ -zirconium phosphate organic derivatives

Monica Pica\*, Anna Donnadio, Giada Mariangeloni, Cristiano Zuccaccia and Mario Casciola.

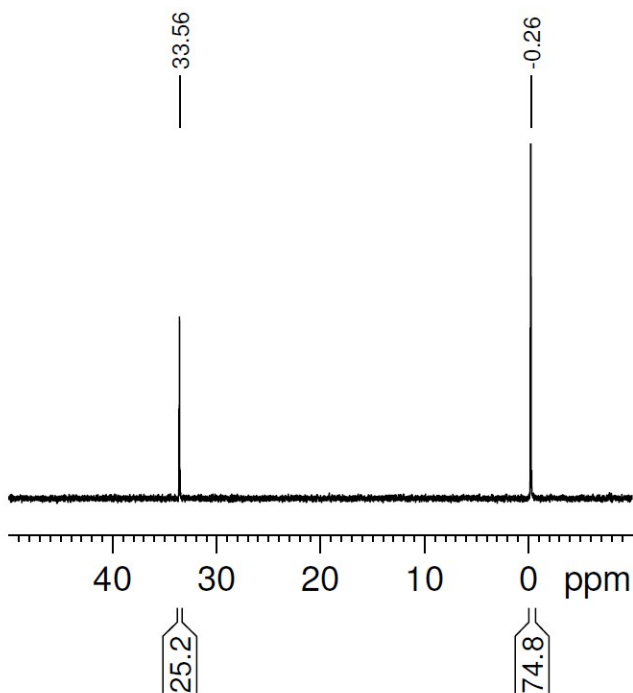

**Figure S1.**  $^{31}\text{P}$  NMR spectrum of the  $\text{ZrP}(\text{PC}_2)_x$  compound obtained for  $X(\text{H}_2\text{PC}_2) = 0.167$

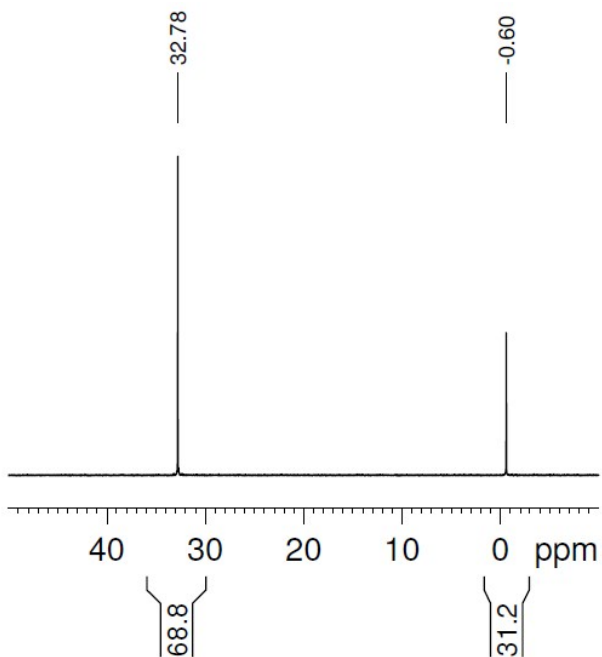

**Figure S2.**  $^{31}\text{P}$  NMR spectrum of the  $\text{ZrP}(\text{PC}_2)_x$  compound obtained for  $X(\text{H}_2\text{PC}_2) = 0.500$

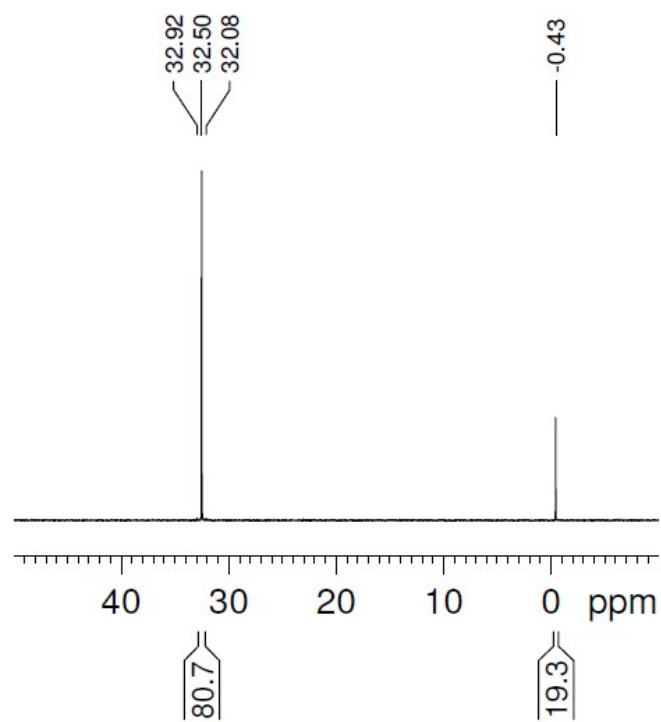

**Figure S3.**  $^{31}\text{P}$  NMR spectrum of the  $\text{ZrP}(\text{PC}_2)_x$  compound obtained for  $X(\text{H}_2\text{PC}_2) = 0.625$
